# Supplementary material for: A multi-line platinum nanozyme-based lateral flow device for the colorimetric evaluation of total antioxidant capacity in different matrices
Source: Royal Society of Chemistry journal article supplement (doi:10.1039/d2na00931e), 2023-01-01
Supplement: d2na00931e1.pdf [file d2na00931e1.pdf]

## Supporting information

# A multi-line platinum nanozyme-based lateral flow device for the colorimetric evaluation of total antioxidant capacity in different matrices

Anna Scarsi<sup>1,2</sup>, Deborah Pedone<sup>1</sup>, Pier Paolo Pompa<sup>1\*</sup>

<sup>1</sup>*Nanobiointeractions & Nanodiagnosics, Istituto Italiano di Tecnologia (IIT), Via Morego 30, 16163-Genova, Italy*

<sup>2</sup>*Department of Chemistry and Industrial Chemistry, University of Genova, Via Dodecaneso 31, 16146-Genova, Italy*

## Platinum nanoparticle characterization

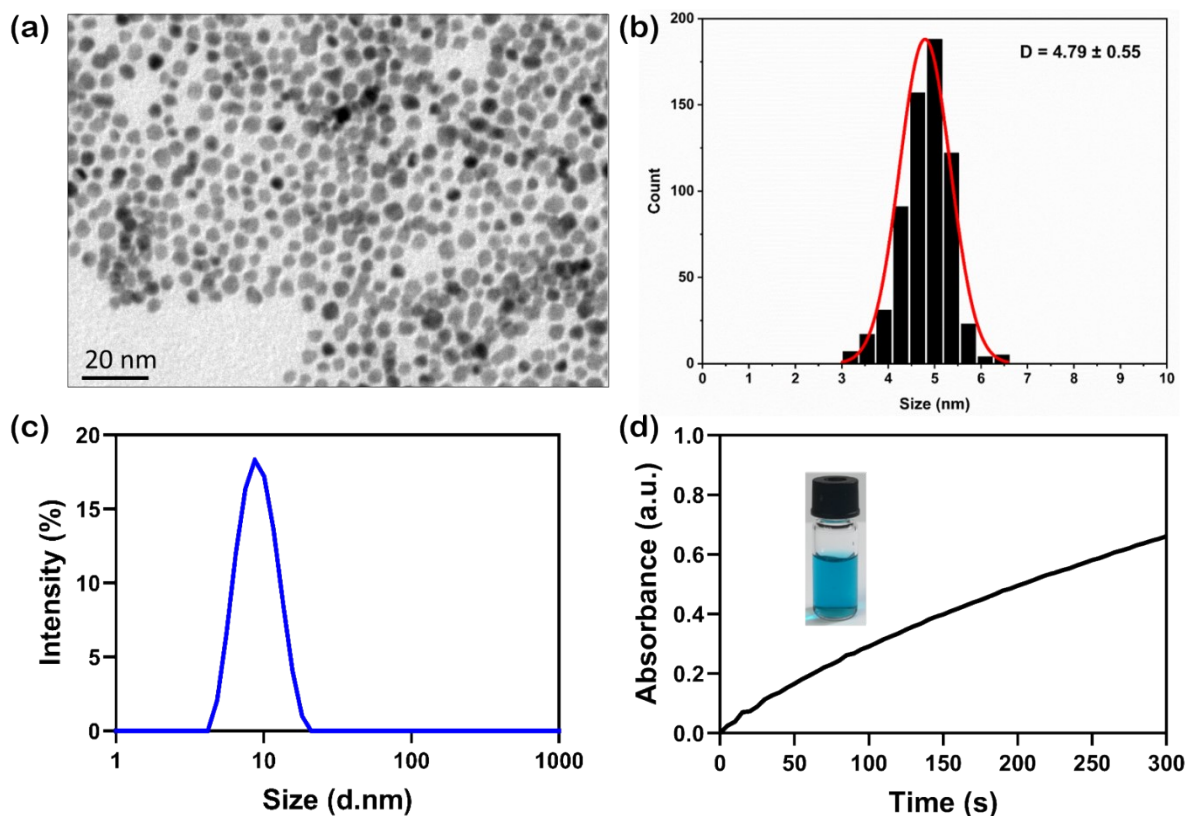

**Figure S1.** Characterization of the synthesized nanoparticles. (a) Representative TEM image of 5 nm platinum nanoparticles (PtNPs) and (b) relative size distribution. (c) DLS analysis of PtNPs. PtNPs are homogeneous in size and shape and present low polydispersity. DLS peak is centered around 9 nm, consistent with the hydrodynamic radius of citrate capped nanoparticles with a diameter of 5 nm. (d) Peroxidase-like activity of PtNPs, showing their high efficiency in the oxidation of the TMB chromogenic probe at low particle concentrations ( $0.33 \mu\text{M}$ ) in presence of hydrogen peroxide (1 M). Inset: representative photograph of a reaction vial revealing the intense blue color reached in only 5 minutes.
